# Supplementary material
Source: PubMed Central journal article supplement (PMC3038733)
Supplement: 1015433108_pnas.201015433SI.pdf [file 1015433108_pnas.201015433SI.pdf]

# Supporting Information

Xu et al. 10.1073/pnas.1015433108

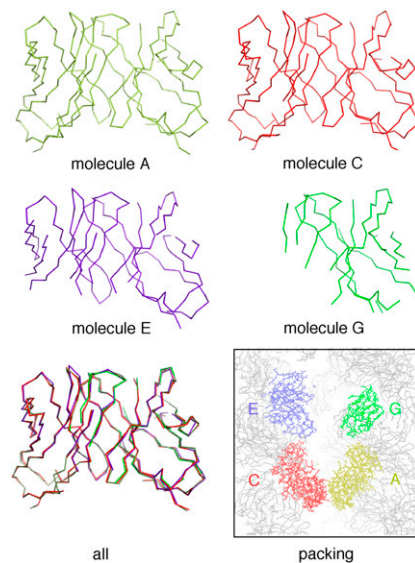

**Fig. S1.** Comparison of the four molecules (A, C, E, and G) within the asymmetric unit of  $\delta 1A/B-3$  crystal and molecular packing in the crystal lattice. Each molecule is displayed in an identical orientation with different color traces. In the molecular packing panel, symmetry mates for the four molecules are shown in light gray as background (related to Fig. 1).

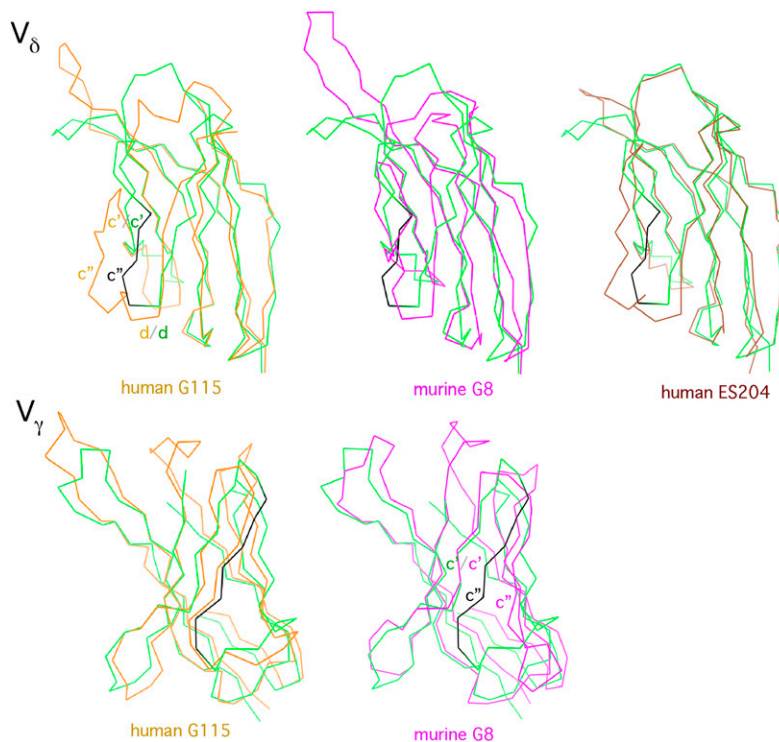

**Fig. S2.** Comparison of  $C''$ -strand positions in  $\gamma\delta$  T-cell receptor (TCR) structures. *Upper* shows  $V_\delta$  domains, and *Lower* shows  $V_\gamma$  domains.  $\gamma\delta$  TCRs are color-coded: green is  $\delta 1A/B-3$  single-chain Fv (scFv), orange is human G115, brown is  $V_{\delta 3}$   $\delta$  chain ES204, and magenta is murine G8.  $C''$  strands of  $\delta 1A/B-3$  are shown in black.  $C''$ ,  $C'''$ , and  $D$  strands are selectively labeled (related to Fig. 2).



**Table S1. Data collection and phasing statistics**

|                                    | Native              | SeMet peak          | SeMet edge          | SeMet remote        |
|------------------------------------|---------------------|---------------------|---------------------|---------------------|
| Space group                        | P4 <sub>3</sub>     | P4 <sub>3</sub>     | P4 <sub>3</sub>     | P4 <sub>3</sub>     |
| Cell dimensions                    |                     |                     |                     |                     |
| <i>a</i> = <i>b</i> ; <i>c</i> (Å) | 112.4, 108.1        | 113.1, 108.8        | 113.8, 108.8        | 113.2, 108.7        |
| Source                             | ALS 5.0.2           | NLSL X29            | NLSL X29            | NLSL X29            |
| Wavelength (Å)                     | 1.0000              | 0.9790              | 0.9793              | 0.9600              |
| Resolution (Å)                     | 50–3.04 (3.16–3.04) | 30–3.73 (3.88–3.73) | 30–3.60 (3.73–3.60) | 30–3.73 (3.88–3.73) |
| Unique reflections                 | 25,563              | 14,399              | 15,396              | 15,235              |
| Redundancy                         | 4.1 (4.1)           | 13.1 (7.8)          | 13.9 (7.9)          | 13.7 (9.8)          |
| Completeness (%)                   | 99.8 (99.1)         | 89.9 (66.7)         | 95.2 (63.2)         | 95.5 (89.2)         |
| <i>I</i> / $\sigma$ (I)            | 48.4 (2.1)          | 31.9 (2.2)          | 41.8 (2.3)          | 37.9 (3.6)          |
| <i>R</i> <sub>merge</sub> (%)      | 5.4 (36.5)          | 8.8 (34.9)          | 7.0 (38.8)          | 8.5 (37.9)          |
| Mean figure of merit               | 0.73                | 0.73                | 0.73                | 0.73                |
| Phasing power                      |                     | 1.48                | 0.95                | 1.64                |

Highest resolution shell statistics are shown in parentheses. SeMet, selenomethionine.

**Table S2. Refinement statistics**

| Statistic                                                  | Value        |
|------------------------------------------------------------|--------------|
| Resolution (Å)                                             | 32.8–3.04    |
| Unique reflections                                         | 24,654       |
| <i>R</i> <sub>cryst</sub> / <i>R</i> <sub>free</sub>       | 0.265/0.308  |
| Average B factor                                           |              |
| Molecules 1, 2                                             | 75.2, 69.8   |
| Molecules 3, 4                                             | 119.9, 119.5 |
| rmsd                                                       |              |
| Bond lengths (Å)                                           | 0.013        |
| Bond angles                                                | 1.4          |
| Ramachandran plot                                          |              |
| Most favored                                               | 82.7%/492    |
| Additional allowed                                         | 16.5%/98     |
| Generously allowed                                         | 0.8%/5       |
| Disallowed                                                 | 0            |
| Estimated coordinate error<br>[maximum likelihood ESU (Å)] | 0.338        |
